# Supplementary material
Source: PubMed Central journal article supplement (PMC6641857)
Supplement: NIHMS1035268-supplement-1.pdf [file NIHMS1035268-supplement-1.pdf]

## Online Supplementary Materials

Table S1. Effective Dates of Prescription Drug Monitoring Programs (PDMPs)

| State                | Date of PDMP Enactment | PDMP Policies Specific to Benzodiazepines    |                                                        | PDMP Policies Specific to Prescription Opioids    |                                                             |
|----------------------|------------------------|----------------------------------------------|--------------------------------------------------------|---------------------------------------------------|-------------------------------------------------------------|
|                      |                        | Date of PDMP Data Access for Benzodiazepines | Date of Mandatory Use of PDMP Data for Benzodiazepines | Date of PDMP Data Access for Prescription Opioids | Date of Mandatory Use of PDMP Data for Prescription Opioids |
| Alabama              | Q2 2004                | Q3 2007                                      | NA                                                     | Q3 2007                                           | NA                                                          |
| Alaska               | Q2 2008                | Q1 2012                                      | NA                                                     | Q1 2012                                           | After 2016                                                  |
| Arizona              | Q3 2007                | Q4 2008                                      | Q3 2011                                                | Q4 2008                                           | Q3 2011                                                     |
| Arkansas             | Q1 2011                | Q1 2013                                      | Q3 2015                                                | Q1 2013                                           | Q3 2015                                                     |
| California           | Q3 2003                | Q1 2010                                      | NA                                                     | Q3 2009                                           | NA                                                          |
| Colorado             | Q2 2005                | Q1 2008                                      | NA                                                     | Q1 2008                                           | Q4 2013                                                     |
| Connecticut          | Q2 2006                | Q3 2008                                      | Q4 2015                                                | Q3 2008                                           | Q4 2015                                                     |
| Delaware             | Q3 2010                | Q3 2012                                      | Q3 2012                                                | Q3 2012                                           | Q3 2012                                                     |
| District of Columbia | Q1 2014                | Q4 2016                                      | NA                                                     | Q4 2016                                           | NA                                                          |
| Florida†             | Q2 2009                | Q4 2011                                      | NA                                                     | Q4 2011                                           | NA                                                          |
| Georgia              | Q2 2011                | Q2 2013                                      | Q3 2014                                                | Q2 2013                                           | Q3 2014                                                     |
| Hawaii               | Before 1999            | Q1 2012                                      | NA                                                     | Q1 2012                                           | NA                                                          |
| Idaho                | Q2 2000                | Q2 2000                                      | NA                                                     | Before 1999                                       | NA                                                          |
| Illinois             | Q3 1999                | Q4 2009                                      | NA                                                     | Q1 2008                                           | NA                                                          |
| Indiana              | Q1 2006                | Q3 2007                                      | NA                                                     | Q3 2007                                           | Q3 2014                                                     |
| Iowa                 | Q2 2006                | Q1 2009                                      | NA                                                     | Q1 2009                                           | NA                                                          |
| Kansas               | Q2 2008                | Q2 2011                                      | NA                                                     | Q2 2011                                           | NA                                                          |
| Kentucky             | Before 1999            | Q3 1999                                      | Q3 2012                                                | Q3 1999                                           | Q3 2012                                                     |
| Louisiana            | Q2 2006                | Q1 2009                                      | NA                                                     | Q1 2009                                           | Q3 2014                                                     |
| Maine                | Q2 2003                | Q1 2005                                      | After 2016                                             | Q1 2005                                           | After 2016                                                  |

|                |             |             |            |             |            |
|----------------|-------------|-------------|------------|-------------|------------|
| Maryland       | Q2 2011     | Q1 2014     | NA         | Q1 2014     | NA         |
| Massachusetts  | Q3 2010     | Q1 2011     | Q1 2013    | Q1 2011     | Q1 2013    |
| Michigan       | Q1 2002     | Q1 2003     | NA         | Q1 2003     | NA         |
| Minnesota      | Q2 2007     | Q2 2010     | NA         | Q2 2010     | Q3 2013    |
| Mississippi    | Q2 2006     | Q2 2006     | Q4 2013    | Q4 2005     | Q4 2013    |
| Missouri       | NA          | NA          | NA         | NA          | NA         |
| Montana        | Q2 2011     | Q4 2012     | NA         | Q4 2012     | NA         |
| Nebraska       | Q2 2011     | Q1 2016     | NA         | Q1 2009     | NA         |
| Nevada         | Before 1999 | Before 1999 | Q4 2007    | Before 1999 | Q4 2007    |
| New Hampshire  | Q2 2012     | Q4 2014     | NA         | Q4 2014     | Q3 2016    |
| New Jersey     | Q1 2008     | Q1 2012     | NA         | Q1 2012     | Q4 2015    |
| New Mexico     | Q3 2004     | Q3 2005     | Q4 2012    | Q3 2005     | Q3 2012    |
| New York       | Before 1999 | Q2 2013     | Q3 2013    | Q2 2013     | Q3 2013    |
| North Carolina | Q3 2005     | Q4 2007     | NA         | Q4 2007     | Q1 2012    |
| North Dakota   | Q2 2007     | Q2 2007     | Q2 2014    | Q2 2007     | Q2 2014    |
| Ohio           | Q4 2004     | Q4 2006     | Q4 2011    | Q4 2006     | Q4 2011    |
| Oklahoma       | Before 1999 | Q3 2006     | Q4 2010    | Q3 2006     | Q4 2010    |
| Oregon         | Q3 2009     | Q3 2011     | NA         | Q3 2011     | NA         |
| Pennsylvania   | Before 1999 | Q3 2016     | Q3 2015    | Q3 2016     | Q3 2015    |
| Rhode Island   | Q4 2001     | Q3 2012     | NA         | Q3 2012     | Q1 2013    |
| South Carolina | Q2 2006     | Q2 2008     | NA         | Q2 2008     | Q2 2016    |
| South Dakota   | Q3 2010     | Q1 2012     | NA         | Q1 2012     | NA         |
| Tennessee      | Before 1999 | Q1 2007     | Q1 2013    | Q1 2007     | Q1 2013    |
| Texas          | Before 1999 | Q2 2012     | Q3 2015    | Q2 2012     | Q3 2015    |
| Utah           | Before 1999 | Before 1999 | NA         | Before 1999 | Q2 2016    |
| Vermont        | Q2 2006     | Q2 2009     | Q4 2013    | Q2 2009     | Q4 2013    |
| Virginia       | Q2 2002     | Q2 2006     | NA         | Q2 2006     | Q3 2015    |
| Washington     | Q2 2007     | Q1 2012     | NA         | Q1 2012     | Q3 2013    |
| West Virginia  | Before 1999 | Q4 2004     | NA         | Q4 2004     | Q2 2012    |
| Wisconsin      | Q2 2010     | Q2 2013     | After 2016 | Q2 2013     | After 2016 |

|         |         |         |    |         |    |
|---------|---------|---------|----|---------|----|
| Wyoming | Q1 2003 | Q3 2013 | NA | Q3 2013 | NA |
|---------|---------|---------|----|---------|----|

Notes: † Florida was excluded from this study.

Data sources:

NAMSDL: <http://www.namsdl.org/prescription-monitoring-programs.cfm>

PEW: <https://www.pewtrusts.org/en/research-and-analysis/data-visualizations/2018/when-are-prescribers-required-to-use-prescription-drug-monitoring-programs>

**Table S2. Sensitivity Analysis Results Including PDMP Policies Specific to Prescription Opioids and Pill Mill Laws, 1999-2016.**

|                                                     | Logged Drug Overdose Death Rate involving Benzodiazepines |                           | Logged Drug Overdose Death Rate involving Prescription Opioids |                           | Logged Drug Overdose Death Rate involving Benzodiazepines and Prescription Opioids |                           |
|-----------------------------------------------------|-----------------------------------------------------------|---------------------------|----------------------------------------------------------------|---------------------------|------------------------------------------------------------------------------------|---------------------------|
|                                                     | Model 1                                                   | Model 2                   | Model 1                                                        | Model 2                   | Model 1                                                                            | Model 2                   |
|                                                     | Coefficients (95% Confidence Intervals)                   |                           |                                                                |                           |                                                                                    |                           |
| PDMP Data Access for Benzodiazepines                | -0.064<br>(-0.97, 0.84)                                   | -0.069<br>(-0.99, 0.85)   | -0.010<br>(-0.25, 0.23)                                        | -0.0052<br>(-0.23, 0.22)  | 0.11<br>(-1.06, 1.29)                                                              | 0.11<br>(1.09, 1.30)      |
| Mandatory Use of PDMP Data for Benzodiazepines      |                                                           | 0.083<br>(-0.44, 0.61)    |                                                                | 0.14<br>(-0.098, 0.38)    |                                                                                    | 0.14<br>(-0.44, 0.72)     |
| PDMP Data Access for Prescription Opioids           | -0.13<br>(-1.05, 0.79)                                    | -0.13<br>(-1.06, 0.80)    | -0.075<br>(-0.35, 0.20)                                        | -0.078<br>(-0.34, 0.19)   | -0.40<br>(-1.56, 0.76)                                                             | -0.40<br>(-1.58, 0.78)    |
| Mandatory Use of PDMP Data for Prescription Opioids |                                                           | -0.18<br>(-0.58, 0.22)    |                                                                | 0.012<br>(-0.13, 0.16)    |                                                                                    | -0.26<br>(-0.78, 0.26)    |
| PDMP Enactment                                      | 0.16<br>(-0.22, 0.54)                                     | 0.15<br>(-0.22, 0.53)     | -0.11<br>(-0.28, 0.061)                                        | -0.11<br>(-0.28, 0.059)   | 0.14<br>(-0.29, 0.56)                                                              | 0.12<br>(-0.31, 0.55)     |
| Pill Mill Law Enactment                             | -0.32<br>(-0.68, 0.038)                                   | -0.29<br>(-0.65, 0.079)   | -0.20<br>(-0.42, 0.027)                                        | -0.24*<br>(-0.46, -0.014) | -0.60**<br>(-1.00, -0.20)                                                          | -0.55*<br>(-0.96, -0.14)  |
| Medicaid Expansion as Part of Affordable Care Act   | 0.14<br>(-0.25, 0.53)                                     | 0.16<br>(-0.23, 0.56)     | 0.15<br>(-0.067, 0.36)                                         | 0.13<br>(-0.072, 0.34)    | -0.020<br>(-0.43, 0.39)                                                            | 0.0069<br>(-0.41, 0.42)   |
| Number of Active Physicians per 1,000 Population    | 0.012<br>(-0.016, 0.041)                                  | 0.012<br>(-0.017, 0.040)  | 0.0039<br>(-0.011, 0.018)                                      | 0.0041<br>(-0.011, 0.019) | 0.017<br>(-0.011, 0.044)                                                           | 0.016<br>(-0.011, 0.043)  |
| Poverty Rate                                        | -0.011<br>(-0.043, 0.021)                                 | -0.011<br>(-0.043, 0.021) | 0.0062<br>(-0.020, 0.032)                                      | 0.0053<br>(-0.021, 0.031) | 0.0067<br>(-0.037, 0.050)                                                          | 0.0068<br>(-0.036, 0.050) |
| Median Household Income                             | 0.011                                                     | 0.010                     | -0.0054                                                        | -0.0050                   | 0.024                                                                              | 0.023                     |

|                                      |                           |                           |                            |                            |                            |                            |
|--------------------------------------|---------------------------|---------------------------|----------------------------|----------------------------|----------------------------|----------------------------|
| in Thousand Dollars                  | (-0.016, 0.037)           | (-0.016, 0.036)           | (-0.022, 0.011)            | (-0.022, 0.011)            | (-0.0028, 0.050)           | (-0.0031, 0.048)           |
| Unemployment Rate                    | 0.062<br>(-0.071, 0.19)   | 0.062<br>(-0.071, 0.19)   | -0.0061<br>(-0.071, 0.059) | -0.0086<br>(-0.069, 0.052) | 0.036<br>(-0.097, 0.17)    | 0.035<br>(-0.098, 0.17)    |
| Constant                             | -2.23**<br>(-3.85, -0.61) | -2.17**<br>(-3.74, -0.59) | -0.57<br>(-1.68, 0.54)     | -0.59<br>(-1.67, 0.50)     | -3.63***<br>(-5.29, -1.97) | -3.54***<br>(-5.13, -1.95) |
| Number of State-Quarter Observations | 3600                      | 3600                      | 3600                       | 3600                       | 3600                       | 3600                       |
| Overall R <sup>2</sup>               | 0.60                      | 0.60                      | 0.67                       | 0.67                       | 0.65                       | 0.65                       |

\* $P < .05$ , \*\* $P < .01$ , \*\*\* $P < .001$

Notes: Data were analyzed at state-quarter level. All regressions were also controlled for state indicators, year indicators, quarter indicators, and state-specific time trends. Standard errors were clustered at state level. Florida was excluded from this study.

**Table S3. Sensitivity Analysis Results Using Negative Binomial Models, 1999-2016.**

|                                                   | Number of Drug Overdose Deaths involving Benzodiazepines |                           | Number of Drug Overdose Deaths involving Prescription Opioids |                             | Number of Drug Overdose Deaths involving Prescription Opioids and Benzodiazepines |                           |
|---------------------------------------------------|----------------------------------------------------------|---------------------------|---------------------------------------------------------------|-----------------------------|-----------------------------------------------------------------------------------|---------------------------|
|                                                   | Model 1                                                  | Model 2                   | Model 1                                                       | Model 2                     | Model 1                                                                           | Model 2                   |
|                                                   | Incidence Rate Ratio (IRR) (95% Confidence Intervals)    |                           |                                                               |                             |                                                                                   |                           |
| PDMP Data Access for Benzodiazepines              | 0.94<br>(0.83, 1.07)                                     | 0.94<br>(0.83, 1.07)      | 0.98<br>(0.90, 1.06)                                          | 0.98<br>(0.90, 1.06)        | 0.91<br>(0.80, 1.05)                                                              | 0.91<br>(0.80, 1.05)      |
| Mandatory Use of PDMP Data for Benzodiazepines    |                                                          | 0.94<br>(0.80, 1.10)      |                                                               | 1.00<br>(0.89, 1.12)        |                                                                                   | 0.88<br>(0.75, 1.03)      |
| PDMP Enactment                                    | 0.95<br>(0.83, 1.08)                                     | 0.95<br>(0.83, 1.08)      | 0.93<br>(0.85, 1.01)                                          | 0.93<br>(0.85, 1.01)        | 0.92<br>(0.80, 1.05)                                                              | 0.92<br>(0.80, 1.05)      |
| Medicaid Expansion as Part of Affordable Care Act | 1.01<br>(0.85, 1.20)                                     | 1.01<br>(0.85, 1.19)      | 1.03<br>(0.92, 1.16)                                          | 1.03<br>(0.92, 1.16)        | 0.92<br>(0.77, 1.09)                                                              | 0.91<br>(0.77, 1.09)      |
| Number of Active Physicians per 1,000 Population  | 1.01<br>(1.00, 1.02)                                     | 1.00<br>(1.00, 1.01)      | 1.00<br>(0.99, 1.01)                                          | 1.00<br>(0.99, 1.01)        | 1.02*<br>(1.00, 1.03)                                                             | 1.02*<br>(1.00, 1.03)     |
| Poverty Rate                                      | 0.99<br>(0.97, 1.02)                                     | 0.99<br>(0.97, 1.02)      | 1.01<br>(0.99, 1.02)                                          | 1.01<br>(0.99, 1.02)        | 0.99<br>(0.97, 1.02)                                                              | 0.99<br>(0.97, 1.02)      |
| Median Household Income in Thousand Dollars       | 1.01<br>(0.99, 1.02)                                     | 1.01<br>(0.99, 1.02)      | 1.00<br>(0.99, 1.01)                                          | 1.00<br>(0.99, 1.01)        | 1.01<br>(0.99, 1.02)                                                              | 1.01<br>(0.99, 1.02)      |
| Unemployment Rate                                 | 1.02<br>(0.97, 1.07)                                     | 1.02<br>(0.97, 1.08)      | 1.02<br>(0.98, 1.05)                                          | 1.02<br>(0.98, 1.05)        | 1.03<br>(0.98, 1.09)                                                              | 1.04<br>(0.98, 1.10)      |
| Population, 100,000                               | 0.96<br>(0.92, 1.01)                                     | 0.96<br>(0.92, 1.01)      | 0.96**<br>(0.94, 0.99)                                        | 0.96**<br>(0.94, 0.99)      | 0.95*<br>(0.90, 1.00)                                                             | 0.95*<br>(0.90, 1.00)     |
| Constant                                          | 16.87**<br>(2.07, 137.55)                                | 16.94**<br>(2.06, 139.37) | 35.89***<br>(10.44, 123.38)                                   | 35.90***<br>(10.39, 124.00) | 22.03**<br>(2.23, 217.38)                                                         | 22.14**<br>(2.26, 216.58) |
| Number of State-Quarter Observations              | 3600                                                     | 3600                      | 3600                                                          | 3600                        | 3600                                                                              | 3600                      |

|                       |      |      |      |      |      |      |
|-----------------------|------|------|------|------|------|------|
| Pseudo R <sup>2</sup> | 0.28 | 0.28 | 0.28 | 0.28 | 0.30 | 0.30 |
|-----------------------|------|------|------|------|------|------|

\* $P < .05$ , \*\* $P < .01$ , \*\*\* $P < .001$

Notes: Data were analyzed at state-quarter level. All regressions were also controlled for state indicators, year indicators, quarter indicators, and state-specific time trends. Standard errors were clustered at state level. Florida was excluded from this study.

**Table S4. Sensitivity Analysis Results Excluding West Virginia, 1999-2016.**

|                                                   | Logged Drug Overdose Death Rate involving Benzodiazepines |                           | Logged Drug Overdose Death Rate involving Prescription Opioids |                            | Logged Drug Overdose Death Rate involving Prescription Opioids and Benzodiazepines |                            |
|---------------------------------------------------|-----------------------------------------------------------|---------------------------|----------------------------------------------------------------|----------------------------|------------------------------------------------------------------------------------|----------------------------|
|                                                   | Model 1                                                   | Model 2                   | Model 1                                                        | Model 2                    | Model 1                                                                            | Model 2                    |
|                                                   | Coefficients (95% Confidence Intervals)                   |                           |                                                                |                            |                                                                                    |                            |
| PDMP Data Access for Benzodiazepines              | -0.17<br>(-0.43, 0.094)                                   | -0.17<br>(-0.43, 0.088)   | -0.067<br>(-0.21, 0.072)                                       | -0.063<br>(-0.20, 0.074)   | -0.24<br>(-0.53, 0.061)                                                            | -0.24<br>(-0.54, 0.050)    |
| Mandatory Use of PDMP Data for Benzodiazepines    |                                                           | -0.14<br>(-0.52, 0.24)    |                                                                | 0.097<br>(-0.11, 0.31)     |                                                                                    | -0.21<br>(-0.52, 0.11)     |
| PDMP Enactment                                    | 0.17<br>(-0.21, 0.55)                                     | 0.17<br>(-0.21, 0.55)     | -0.11<br>(-0.28, 0.065)                                        | -0.11<br>(-0.28, 0.064)    | 0.15<br>(-0.28, 0.58)                                                              | 0.15<br>(-0.28, 0.58)      |
| Medicaid Expansion as Part of Affordable Care Act | 0.19<br>(-0.23, 0.60)                                     | 0.20<br>(-0.21, 0.61)     | 0.18<br>(-0.043, 0.40)                                         | 0.17<br>(-0.044, 0.38)     | 0.043<br>(-0.39, 0.48)                                                             | 0.061<br>(-0.38, 0.50)     |
| Number of Active Physicians per 1,000 Population  | 0.011<br>(-0.017, 0.039)                                  | 0.011<br>(-0.017, 0.039)  | 0.0033<br>(-0.012, 0.018)                                      | 0.0034<br>(-0.012, 0.019)  | 0.016<br>(-0.012, 0.044)                                                           | 0.016<br>(-0.012, 0.043)   |
| Poverty Rate                                      | -0.013<br>(-0.047, 0.021)                                 | -0.012<br>(-0.046, 0.022) | 0.0040<br>(-0.024, 0.032)                                      | 0.0034<br>(-0.024, 0.031)  | 0.0028<br>(-0.044, 0.049)                                                          | 0.0041<br>(-0.043, 0.051)  |
| Median Household Income in Thousand Dollars       | 0.0093<br>(-0.019, 0.037)                                 | 0.0089<br>(-0.019, 0.037) | -0.0065<br>(-0.024, 0.011)                                     | -0.0062<br>(-0.023, 0.011) | 0.023<br>(-0.0050, 0.050)                                                          | 0.022<br>(-0.0054, 0.050)  |
| Unemployment Rate                                 | 0.080<br>(-0.052, 0.21)                                   | 0.082<br>(-0.052, 0.22)   | 0.0073<br>(-0.057, 0.072)                                      | 0.0059<br>(-0.056, 0.068)  | 0.070<br>(-0.061, 0.20)                                                            | 0.073<br>(-0.061, 0.21)    |
| Constant                                          | -2.18*<br>(-3.88, -0.47)                                  | -2.17*<br>(-3.87, -0.46)  | -0.50<br>(-1.65, 0.65)                                         | -0.50<br>(-1.65, 0.64)     | -3.52***<br>(-5.29, -1.76)                                                         | -3.51***<br>(-5.27, -1.75) |
| Number of State-Quarter Observations              | 3528                                                      | 3528                      | 3528                                                           | 3528                       | 3528                                                                               | 3528                       |



|                        |      |      |      |      |      |      |
|------------------------|------|------|------|------|------|------|
| Overall R <sup>2</sup> | 0.58 | 0.58 | 0.66 | 0.66 | 0.64 | 0.64 |
|------------------------|------|------|------|------|------|------|

\* $P < .05$ , \*\*\* $P < .001$

Notes: Data were analyzed at state-quarter level. All regressions were also controlled for state indicators, year indicators, quarter indicators, and state-specific time trends. Standard Errors were clustered at state level. Florida and West Virginia were both excluded from this analysis.
